# Supplementary material for: Interaction of natural killer cells with neutrophils exerts a significant antitumor immunity in hematopoietic stem cell transplantation recipients
Source: PubMed Central journal article supplement (PMC4708905; doi:10.1002/cam4.550), 2015-11-21
Supplement: CAM4-5-049-s001.pdf [file CAM4-5-049-s001.pdf]

Supplemental Figure S1

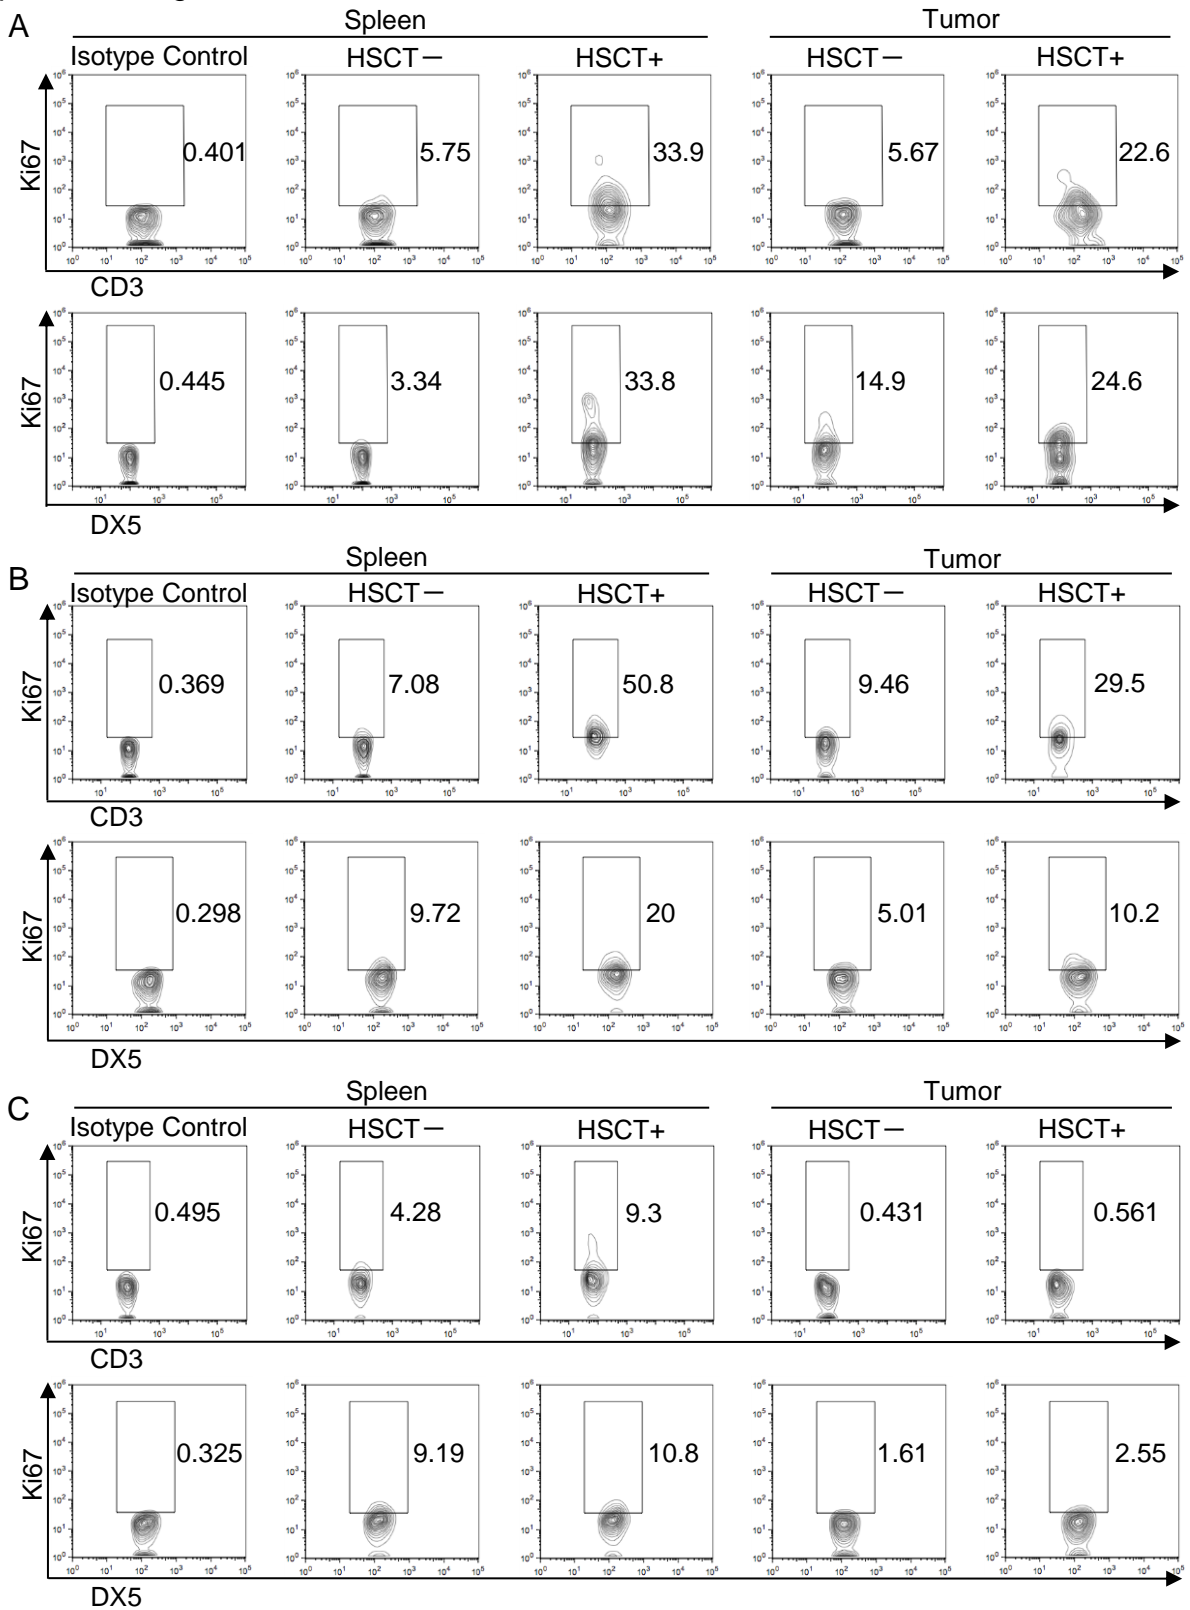

**Supplemental Figure S1.** Ki67<sup>+</sup> cells within NK cells and T cells in the spleen and tumor. The frequency of Ki67<sup>+</sup> NK cells and T cells was analyzed by flow cytometry. Since the cut-off line of Ki67<sup>+</sup> cells is unclear, representative dot plots of isotype control and Ki67<sup>+</sup> cells in the spleen and tumor at days 7 (A), 14 (B), and 21 (C) after tumor inoculation are shown. NK cells were defined as CD3<sup>-</sup> DX5<sup>+</sup> cells gated on live CD45<sup>+</sup> cells. T cells were defined as CD3<sup>+</sup> DX5<sup>-</sup> cells gated on live CD45<sup>+</sup> cells.

## Supplemental Figure S2

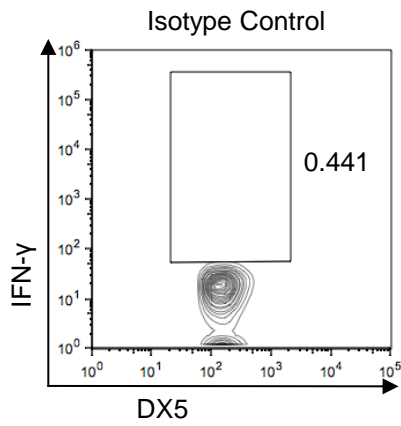

**Supplemental Figure S2.** IFN- $\gamma$  production of NK cells in tumor. TILs isolated from tumors at day14 after syngeneic HSCT were restimulated with YAC-1 cells *ex vivo*. The frequency of IFN- $\gamma^+$  NK cells was analyzed by flow cytometry. Since the cut-off line of IFN- $\gamma^+$  cells is unclear, a representative dot plot of isotype control of splenocytes is shown.

## Supplemental Figure S3

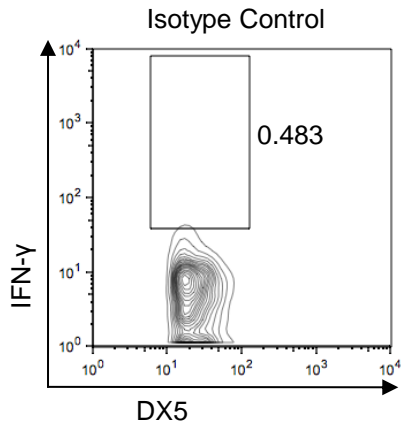

**Supplemental Figure S3.** IFN- $\gamma$  production of NK cells in tumor with neutrophil depletion. TILs isolated from tumors at day14 after syngeneic HSCT were restimulated with YAC-1 cells *ex vivo*. The frequency of IFN- $\gamma^+$  NK cells was analyzed by flow cytometry. A representative dot plot of isotype control of splenocytes is shown.

## Supplemental Figure S4

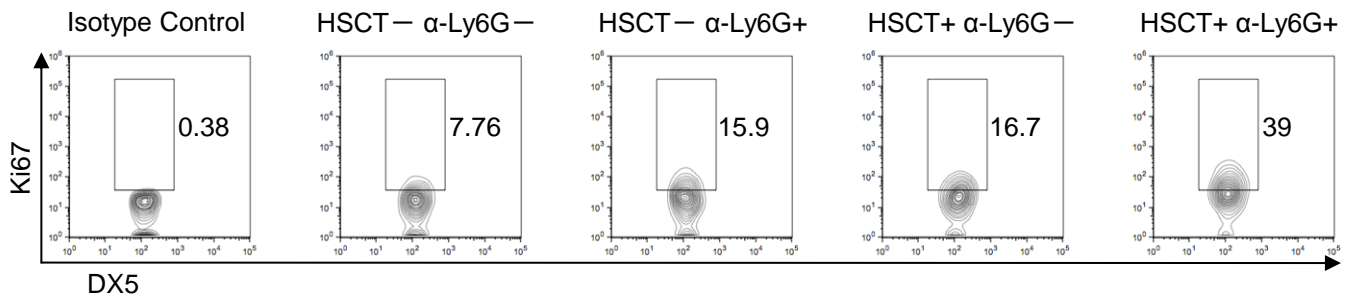

**Supplemental Figure S4.** Ki67<sup>+</sup> cells within NK cells in tumor with neutrophil depletion at day 14 after syngeneic HSCT. The frequency of Ki67<sup>+</sup> NK cells was analyzed. Representative dot plots of isotype control and Ki67<sup>+</sup> cells in a tumor are shown.
